# Supplementary material for: Ketoximes to N-substituted thioamides via PSCl3 mediated Beckmann rearrangement
Source: Royal Society of Chemistry journal article supplement (doi:10.1039/b911844f), 2009-01-01
Supplement: b911844f.pdf [file b911844f.pdf]

## Supplementary Information for

### Ketoximes to *N*-substituted thioamides *via* PSCl<sub>3</sub> mediated Beckmann Rearrangement

Uma Pathak\*, Lokesh K. Pandey, Sweta Mathur, M. V. S. Suryanarayana

*Synthetic Chemistry Division, Defence R & D Establishment,*

*Gwalior (M.P.), India-474002*

Email: sc\_drde@rediffmail.com

**General Information:** Reagents were obtained from commercial supplier, and used without further purification. Ketoximes for entry 3, 5, 6, 7, 8, 9, 10, 12, 13, were prepared from corresponding ketones by reported procedure<sup>1</sup>. Solvents were purified by the usual method and stored over molecular sieves. Freshly distilled thiophosphoryl chloride was used. The reaction was monitored by GC using 30m x 0.32 mm with 0.25 $\mu$  phase film BP-5 column. <sup>1</sup>H, <sup>13</sup>C and <sup>31</sup>P NMR spectra were recorded on 400 MHz spectrometer, with chemical shift value being

reported in ppm. All coupling constants ( $J$ ) are reported in Hertz (Hz). Mass spectra were obtained using gas chromatography (GC) methodology on a GC-MS instrument.

**Table1. Optimization of Reaction Condition**

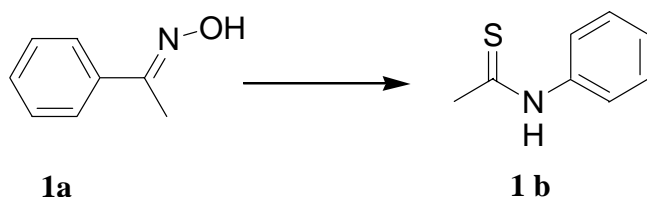

| S No. | Solvent      | Reaction condition                                                                                                                                    | Conversion (%) | Thioamide Selectivity <sup>a</sup> (%) |
|-------|--------------|-------------------------------------------------------------------------------------------------------------------------------------------------------|----------------|----------------------------------------|
| 1.    | Benzene      | 1equiv of PSCl <sub>3</sub> , H <sub>2</sub> O and 1a, 0-5 °C, 3 h                                                                                    | 85             | 10                                     |
| 2.    | Benzene      | 1equiv of PSCl <sub>3</sub> and 1a, 0-5 °C, 3 h                                                                                                       | 95             | 25                                     |
| 3.    | Benzene      | 1 equiv of PSCl <sub>3</sub> added to 1a at rt, 3 h                                                                                                   | 98             | 35                                     |
| 4.    | Benzene      | 1 equiv of PSCl <sub>3</sub> added to 1a at rt, reflux 1h                                                                                             | 98             | 45                                     |
| 5.    | Benzene      | 2 equiv of PSCl <sub>3</sub> added to 1a at rt, reflux 3h                                                                                             | 98             | 45                                     |
| 6.    | Ethylacetate | 1 equiv of PSCl <sub>3</sub> added to 1a at rt, 3 h                                                                                                   | 98             | 30                                     |
| 7.    | Ethylacetate | 1 equiv of PSCl <sub>3</sub> added to 1a at rt, reflux 1 h                                                                                            | 98             | 40                                     |
| 8.    | Chloroform   | 1 equiv of PSCl <sub>3</sub> added to 1a at rt, reflux 1 h                                                                                            | 98             | 45                                     |
| 9.    | Acetonitrile | 1 equiv of PSCl <sub>3</sub> added to 1a at rt, reflux 1 h                                                                                            | 98             | 60                                     |
| 10.   | Acetonitrile | 1 equiv of PSCl <sub>3</sub> added to 1a at rt, then add 1 equiv of H <sub>2</sub> O and 1.5 equiv of Et <sub>3</sub> N, Heat at 80 °C                | 98             | 70                                     |
| 11.   | Nitromethane | 1.5 equiv of PSCl <sub>3</sub> added to 1a at rt, then add 1 equiv of H <sub>2</sub> O and 1.5 equiv of Et <sub>3</sub> N, Heat at 80 °C              | 99             | 70                                     |
| 12.   | Nitromethane | 1.5 equiv of PSCl <sub>3</sub> added to 1a dropwise at 0-5 °C, reflux 1h                                                                              | 99             | 93*                                    |
| 13.   | -            | 1 equiv each of PSCl <sub>3</sub> , 1a at 0 °C                                                                                                        | 70             | 20                                     |
| 14.   | -            | 1 equiv each of PSCl <sub>3</sub> , 1a at rt, violent reaction                                                                                        | 95             | 50                                     |
| 15.   | -            | To 1 equiv of PSCl <sub>3</sub> and H <sub>2</sub> O each, add 1.5 equiv of Et <sub>3</sub> N slowly at 0-5 °C, add 1a and heat at 70-80 °C for 0.5 h | 99             | 91                                     |

<sup>a</sup>Reaction was monitored by GC and GC-MS

\*Conversion indicated by GC. But when the reaction was worked-up it was found to be contaminated with significant amount of corresponding amide.

**Scheme 1.** Proposed mechanism for conversion of H to F (Scheme 2)

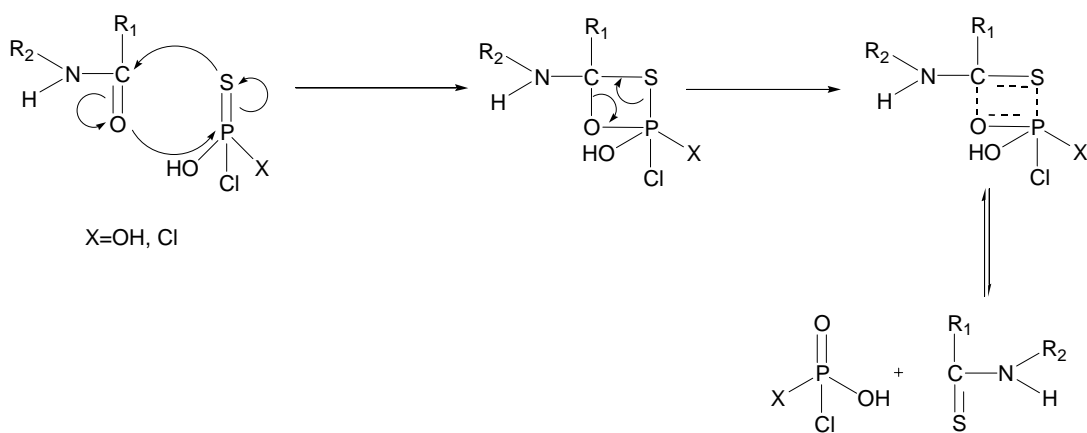

**Characterizations Data**

***N*-Phenyl-thioacetamide (1):** Mp 75-76 °C (Lit.<sup>2</sup> 76 °C), Yellow solid, <sup>1</sup>H NMR (400 MHz, CDCl<sub>3</sub>) δ 9.71 (br, s, 1H, NH), 8.87 (br, s, 1.3H, NH), 7.67-7.65 (m, 1.4H), 7.45-7.26 (m, 3H), 7.17-7.15 (m, 2H), 2.73 (s, 2.6H), 2.51 (s, 2H); EIMS: 151 [M<sup>+</sup>], 150, 118, 110, 93, 77, 59. Anal. Calc for C<sub>8</sub>H<sub>9</sub>NS. C, 63.54; H, 6.00; N, 9.26; S, 21.20. Found C, 63.64; H, 5.83; N, 9.18; S, 21.33.

***N*-Phenyl-thiobenzamide (2):** Mp 100-101 °C (Lit.<sup>2</sup> 100 °C), Pale yellow solid, <sup>1</sup>H NMR (400 MHz, CDCl<sub>3</sub>): δ 9.09 (s, br, 1H, NH), 7.18-7.88 (m, 10 H); EIMS: 213 [M<sup>+</sup>], 197, 180, 121, 110, 77, 51. Anal. Calcd for C<sub>13</sub>H<sub>11</sub>NS. C, 73.20; H, 5.20; N, 6.57; S, 15.03. Found: C, 73.36; H, 5.13; N, 6.62; S, 14.88.

**Azepane-2-thione (4):** Mp 106-107 °C (Lit.<sup>2</sup> 106 °C), Colorless solid, <sup>1</sup>H NMR (400 MHz, CDCl<sub>3</sub>) δ 9.13 (s, br, 1H, NH), 3.38 (dd, 2H, *J*<sub>1</sub>=4 Hz, *J*<sub>2</sub>=6 Hz), 3.00-2.97 (t, 2H, *J*=5.2 Hz), 1.79-1.63 (m, 6H); EIMS: 129 [M<sup>+</sup>], 114, 100, 96, 71, 41. Anal. Calc for C<sub>6</sub>H<sub>11</sub>NS. C, 55.77; H, 8.58; N, 10.84; S, 24.81. Found C, 55.89; H, 8.74; N, 10.91; S, 24.45.

**Azacyclotridecane-2-thione (5):** Mp 107-108 °C (Lit.<sup>3</sup> 106.5 °C), White solid, <sup>1</sup>H NMR (400 MHz, CDCl<sub>3</sub>): δ 7.35 (s, br, NH, 1H), 3.82-3.78 (m, 2H), 2.78-2.75 (m, 2H), 1.88-1.83 (m, 2H), 1.77-1.70 (m, 2H), 1.46-1.33 (m, 14H); EIMS: 213 [M<sup>+</sup>], 180, 114, 89. Anal. Calc for C<sub>12</sub>H<sub>23</sub>NS. C, 67.54; H, 10.86; N, 6.56; S, 15.03. Found: C, 67.68, H, 10.74; N, 6.63; S, 14.93.

***N*-(4-Chloro-phenyl)-thioacetamide (6):** Mp 142-144 °C (Lit.<sup>2</sup> 144 °C), Beige solid, <sup>1</sup>H NMR (400 MHz, CDCl<sub>3</sub>): δ 9.30 and 8.63 (each s, br, 1H, NH), 7.68 (dd, *J*<sub>1</sub>=2 Hz, *J*<sub>2</sub>=4.8 Hz), 7.40-7.47 (m), and 7.17 (d, *J*=8.4 Hz) for total 4H, 2.78 and 2.55 (each s, total 3H); EIMS: 185 [M<sup>+</sup>], 151, 127, 111, 108, 75, 59. Anal. Calc for C<sub>8</sub>H<sub>8</sub>ClNS. C, 51.75; H, 4.34; N, 7.54; S, 17.27. Found: C, 51.85; H, 4.48; N, 7.45; S, 17.10.

***N*-(4-Methoxy-phenyl)-thioacetamide (8):** Mp 115-117 °C (Lit.<sup>2</sup> 116 °C), Off-white solid, <sup>1</sup>H NMR (400 MHz, CDCl<sub>3</sub>) δ 9.48 and 9.08 (each, s, br, 1H, NH), 7.53 (dd, *J*<sub>1</sub>=2 Hz, *J*<sub>2</sub>=4.8 Hz), 7.10 (dd, *J*<sub>1</sub>=2 Hz, *J*<sub>2</sub>=4.8 Hz), and 6.93-6.90 (m)

for total 4H, 3.84-3.81 (m, 3H), 2.72 and 2.45 (each s, total 3H); EIMS: 181 [M<sup>+</sup>], 165, 140, 108, 77, 59. Anal. Calc for C<sub>9</sub>H<sub>11</sub>NOS. C, 59.64; H, 6.12; N, 7.73; S, 17.69. Found: C, 59.78; H, 5.98, N, 7.81; S, 17.59.

***N*-(4-Nitro-phenyl)-thioacetamide (9)**: Mp 172-174 °C (Lit.<sup>4</sup> 173.5-175 °C), Yellow solid, <sup>1</sup>H NMR (400 MHz, CDCl<sub>3</sub>): δ 8.86 (s, br, NH, 1H), 8.27 (d, 2H, J=6 Hz), 8.07 (d, 2H, J=12.4 Hz), 2.77 (s, 3H); EIMS: 196 [M<sup>+</sup>], 163, 138, 117, 92, 76, 59. Anal. Calc for C<sub>8</sub>H<sub>8</sub>N<sub>2</sub>O<sub>2</sub>S. C, 48.97; H, 4.11; N, 14.28; S, 16.34. Found: C, 49.09; H, 3.98; N, 14.35; S, 16.27.

***N*-(3-Nitro-phenyl)-thioacetamide (10)**: Mp 98-100 °C (Lit.<sup>2</sup> 98 °C), Yellow solid, <sup>1</sup>H NMR (400 MHz, CDCl<sub>3</sub>): δ 8.3 (s, 1H), 7.96 (dd, 2H, J<sub>1</sub>=2 Hz, J<sub>2</sub>=6.4 Hz), 7.61 (s, br, 1H, NH), 7.49 (t, 1H, J=8.4 Hz), 2.23 (s, 3H); EIMS: 196 [M<sup>+</sup>], 149, 117, 92, 59. Anal. Calc for C<sub>8</sub>H<sub>8</sub>N<sub>2</sub>O<sub>2</sub>S. C, 48.97; H, 4.11; N, 14.28; S, 16.34. Found: C, 49.05; H, 4.21; N, 14.21; S, 16.21.

***N*-Ethyl-thioacetamide (11)**: Light yellow oil (Lit.<sup>5</sup>), <sup>1</sup>H NMR (400 MHz, DMSO-d<sub>6</sub>): δ 9.92 (s, br, 1H, NH), 3.47 (dd, 2H, J<sub>1</sub>=1.6 Hz, J<sub>2</sub>=5.6 Hz), 2.36 (s, 3H), 1.12 (t, 3H, J=7.2 Hz); EIMS: 103 [M<sup>+</sup>], 88, 74, 59. Anal. Calc for C<sub>4</sub>H<sub>9</sub>NS. C, 46.56; H, 8.79; N, 13.57; S, 31.08. Found: C, 46.67; H, 8.62; N, 13.48; S, 31.21.

**N-Benzyl-thioacetamide (12):** Mp 65-66 °C (Lit.<sup>6</sup> 65.1-65.3 °C), White solid, <sup>1</sup>H NMR (400 MHz, CDCl<sub>3</sub>): δ 7.37-7.32 (m, 6H), 4.81 (d, 2H, *J*=5.2 Hz), 2.59 (s, 3H); EIMS: 165 [M<sup>+</sup>], 132, 106, 91, 79, 65, 51. Anal. Calc for C<sub>9</sub>H<sub>11</sub>NS. C, 65.41; H, 6.71; N, 8.48; S, 19.40. Found: C, 65.53; H, 6.87; N, 8.41; S, 19.17.

**N-Benzyl-2-phenyl-thioacetamide (13):** Mp 78-79 °C (Lit.<sup>7</sup> 80-81 °C), Yellow solid, <sup>1</sup>H NMR (400 MHz, CDCl<sub>3</sub>): δ 7.37-7.15 (m, 11H), 4.81 (d, 2H, *J*=5.2 Hz), 4.17 (s, 2H); EIMS: 241 [M<sup>+</sup>], 208, 167, 91, 65. Anal. Calc for C<sub>15</sub>H<sub>15</sub>NS. C, 74.65; H, 6.26; N, 5.80; S, 13.29. Found: C, 74.79; H, 6.18; N, 5.87; S, 13.14.

**N-Methyl-thioacetamide (15):** Mp 56-58 °C (Lit.<sup>8</sup> 56-57 °C), White solid, <sup>1</sup>H NMR (400 MHz, CDCl<sub>3</sub>) δ 7.20 (s, br, 1H, NH), 3.10 (d, 3H, *J*=4.8 Hz), 2.50 (s, 3H); EIMS: 89 [M<sup>+</sup>], 74, 56. Anal. Calc for C<sub>3</sub>H<sub>7</sub>NS. C, 40.41; H, 7.91; N, 15.71; S, 35.96. Found C, 40.55; H, 8.05; N, 15.61; S, 35.77.

**Reference:**

1. Y. Furuya, K. Ishihara, and H. Yamamoto, *J. Am. Chem. Soc.* 2005, **127**, 11240.
2. M. P. Cava and M. I. Levinson, *Tetrahedron* 1985, **41**, 5061
3. *Chem. Abstr.* 1960, 54, 19453a.
4. J. T. Eward, I. Lantos, G. D. Derald and S. C. Wong, *Can. J. Chem.* 1977, **55**, 812.
5. C. G. Moore and R. W. Saville, *J. Chem. Soc.* 1954, 2082.
6. M. J. Schlatter, *J. Am. Chem. Soc.* 1942, **64**, 2722
7. F. Malek-Yazdi and M. Yalpani, *Synthesis*, 1977, 328.
8. D. C. Smith, S. W. Lee and P. L. Fuchs, *J. Org. Chem.* 1994, **59**, 348.
